# Supplementary material
Source: MDPI journal article supplement (https://www.mdpi.com/2039-7283/13/5/104)
Supplement: s1 [file s1]

Supplementary Table S1 Potassium Identification Results by Chatbots

| Diet                        | Potassium level | GPT 3.5 (1 <sup>st</sup> test) | GPT 3.5 (2 <sup>nd</sup> test) | GPT 4   | Bard AI   | Bing AI   |
|-----------------------------|-----------------|--------------------------------|--------------------------------|---------|-----------|-----------|
| Acorn squash                | High            | correct                        | Correct                        | correct | correct   | correct   |
| Apricots                    | High            | correct                        | correct                        | correct | correct   | correct   |
| Artichoke                   | High            | correct                        | incorrect                      | correct | correct   | correct   |
| Artichoke hearts            | High            | correct                        | incorrect                      | correct | correct   | correct   |
| Baked beans                 | High            | correct                        | correct                        | correct | correct   | correct   |
| Baked potato                | High            | correct                        | correct                        | correct | correct   | correct   |
| Banana                      | High            | correct                        | correct                        | correct | correct   | correct   |
| Beets                       | High            | correct                        | correct                        | correct | correct   | correct   |
| Black beans                 | High            | correct                        | correct                        | correct | correct   | correct   |
| Black-eyed peas             | High            | correct                        | correct                        | correct | correct   | correct   |
| Brussels sprouts            | High            | correct                        | correct                        | correct | correct   | correct   |
| Butternut squash            | High            | correct                        | correct                        | correct | correct   | correct   |
| Cantaloupe                  | High            | correct                        | correct                        | correct | correct   | correct   |
| Carrot juice                | High            | incorrect                      | incorrect                      | correct | correct   | correct   |
| Chicory                     | High            | correct                        | correct                        | correct | correct   | correct   |
| Chocolate milk              | High            | correct                        | correct                        | correct | correct   | incorrect |
| Cocoa mix (made with milk)  | High            | incorrect                      | correct                        | correct | incorrect | incorrect |
| Cocoa mix (made with water) | High            | incorrect                      | incorrect                      | correct | incorrect | incorrect |
| Collards                    | High            | correct                        | correct                        | correct | correct   | correct   |
| Cowpeas                     | High            | correct                        | correct                        | correct | correct   | correct   |
| Edamame                     | High            | correct                        | correct                        | correct | correct   | correct   |
| Elderberries                | High            | correct                        | incorrect                      | correct | correct   | correct   |
| Enriched rice milk          | High            | correct                        | incorrect                      | correct | incorrect | incorrect |
| Enriched soymilk            | High            | correct                        | correct                        | correct | incorrect | incorrect |
| Fava beans                  | High            | correct                        | correct                        | correct | correct   | correct   |
| Figs                        | High            | correct                        | correct                        | correct | correct   | correct   |
| Firm tofu                   | High            | correct                        | correct                        | correct | incorrect | incorrect |
| Flavored yogurt             | High            | correct                        | correct                        | correct | incorrect | incorrect |
| Gooseberries                | High            | correct                        | correct                        | correct | correct   | correct   |
| Green beans                 | High            | correct                        | correct                        | correct | correct   | correct   |
| Guava                       | High            | correct                        | correct                        | correct | correct   | correct   |
| Honeydew                    | High            | correct                        | incorrect                      | correct | correct   | correct   |
| Hubbard squash              | High            | correct                        | correct                        | correct | correct   | correct   |
| pales or cactus leaves      | High            | correct                        | correct                        | correct | correct   | correct   |
| Kidney beans                | High            | correct                        | correct                        | correct | correct   | correct   |
| Kiwifruit                   | High            | correct                        | correct                        | correct | correct   | correct   |
| Kohlrabi                    | High            | correct                        | incorrect                      | correct | correct   | correct   |

|                               |      |           |           |           |           |           |
|-------------------------------|------|-----------|-----------|-----------|-----------|-----------|
| Lentils                       | High | correct   | correct   | correct   | correct   | correct   |
| Lima beans                    | High | correct   | correct   | correct   | correct   | correct   |
| low sodium V8 vegetable juice | High | incorrect | correct   | incorrect | correct   | correct   |
| Mango                         | High | correct   | correct   | correct   | correct   | incorrect |
| Milk                          | High | incorrect | correct   | correct   | incorrect | correct   |
| Mixed vegetables              | High | correct   | correct   | correct   | incorrect | correct   |
| Mushrooms                     | High | correct   | incorrect | correct   | incorrect | incorrect |
| Navy beans                    | High | correct   | correct   | correct   | correct   | correct   |
| Nectarine                     | High | correct   | correct   | correct   | correct   | correct   |
| Orange                        | High | correct   | correct   | correct   | correct   | correct   |
| Orange juice                  | High | correct   | correct   | correct   | correct   | correct   |
| Papaya                        | High | correct   | incorrect | correct   | correct   | correct   |
| Parsnips                      | High | correct   | correct   | correct   | correct   | correct   |
| Passion fruit juice           | High | correct   | correct   | correct   | incorrect | correct   |
| Pinto beans                   | High | correct   | correct   | correct   | correct   | correct   |
| Plain soymilk                 | High | correct   | correct   | correct   | incorrect | incorrect |
| Plain yogurt                  | High | correct   | correct   | correct   | incorrect | incorrect |
| Plantains                     | High | correct   | correct   | correct   | correct   | correct   |
| Pomegranate                   | High | correct   | correct   | correct   | correct   | correct   |
| Pomegranate juice             | High | correct   | correct   | correct   | correct   | correct   |
| Prickly pear                  | High | correct   | correct   | correct   | correct   | incorrect |
| Prune juice                   | High | correct   | correct   | correct   | correct   | correct   |
| Prunes                        | High | correct   | correct   | correct   | correct   | correct   |
| Pumpkin                       | High | correct   | incorrect | correct   | correct   | correct   |
| Refried beans                 | High | correct   | correct   | correct   | correct   | correct   |
| Rutabaga                      | High | correct   | correct   | correct   | correct   | correct   |
| Soybeans                      | High | correct   | correct   | correct   | correct   | correct   |
| Spaghetti sauce               | High | correct   | correct   | correct   | correct   | correct   |
| Split peas                    | High | correct   | correct   | correct   | correct   | correct   |
| Strawberries                  | High | incorrect | incorrect | correct   | incorrect | incorrect |
| Sweet potatoes                | High | correct   | correct   | correct   | correct   | correct   |
| Sweet red cherries            | High | correct   | correct   | correct   | correct   | incorrect |
| Swiss chard                   | High | correct   | correct   | correct   | correct   | correct   |
| Tangerines                    | High | incorrect | incorrect | correct   | incorrect | correct   |
| Tomato                        | High | correct   | incorrect | correct   | correct   | correct   |
| Tomato juice                  | High | correct   | correct   | correct   | correct   | correct   |
| Tomato paste                  | High | correct   | correct   | correct   | correct   | correct   |
| Tomato sauce                  | High | correct   | correct   | correct   | correct   | correct   |
| V8 vegetable juice            | High | correct   | correct   | correct   | correct   | correct   |
| Watermelon                    | High | incorrect | incorrect | correct   | incorrect | incorrect |

|                          |      |           |           |           |           |           |
|--------------------------|------|-----------|-----------|-----------|-----------|-----------|
| White beans              | High | correct   | correct   | correct   | correct   | correct   |
| Yam                      | High | correct   | correct   | correct   | correct   | correct   |
| Yellow summer squash     | High | correct   | incorrect | correct   | incorrect | correct   |
| Zucchini                 | High | incorrect | incorrect | correct   | incorrect | correct   |
| Alfalfa sprouts          | Low  | incorrect | correct   | correct   | correct   | correct   |
| Apple                    | Low  | correct   | incorrect | correct   | correct   | correct   |
| Apple cider              | Low  | incorrect | correct   | correct   | correct   | correct   |
| Apple juice              | Low  | incorrect | incorrect | correct   | correct   | correct   |
| Applesauce               | Low  | incorrect | correct   | correct   | incorrect | correct   |
| Apricot nectar           | Low  | incorrect | incorrect | correct   | correct   | correct   |
| Asparagus                | Low  | incorrect | correct   | correct   | correct   | correct   |
| Avocado                  | Low  | incorrect | incorrect | incorrect | incorrect | incorrect |
| Bean sprouts             | Low  | correct   | correct   | correct   | correct   | correct   |
| Blackberries             | Low  | incorrect | incorrect | correct   | correct   | correct   |
| Blueberries              | Low  | correct   | correct   | correct   | correct   | correct   |
| Boysenberries            | Low  | incorrect | incorrect | correct   | correct   | correct   |
| Butter head lettuce      | Low  | correct   | correct   | correct   | correct   | correct   |
| Cabbage                  | Low  | incorrect | correct   | correct   | correct   | correct   |
| Chickpeas                | Low  | incorrect | incorrect | incorrect | incorrect | correct   |
| Coffee                   | Low  | correct   | correct   | correct   | correct   | correct   |
| Corn                     | Low  | correct   | correct   | incorrect | correct   | correct   |
| Cranberries              | Low  | correct   | correct   | correct   | correct   | correct   |
| Cranberry juice cocktail | Low  | correct   | correct   | correct   | incorrect | correct   |
| Cranberry sauce          | Low  | incorrect | incorrect | correct   | incorrect | correct   |
| Cucumber                 | Low  | correct   | correct   | correct   | correct   | correct   |
| Dates                    | Low  | incorrect | incorrect | incorrect | incorrect | correct   |
| Eggplant                 | Low  | incorrect | incorrect | correct   | correct   | correct   |
| Fruit cocktail           | Low  | incorrect | correct   | correct   | correct   | correct   |
| Garbanzo beans           | Low  | incorrect | incorrect | incorrect | incorrect | correct   |
| Grape juice              | Low  | incorrect | incorrect | correct   | correct   | correct   |
| Grapefruit juice         | Low  | incorrect | incorrect | correct   | incorrect | correct   |
| Grapes                   | Low  | incorrect | incorrect | correct   | correct   | correct   |
| Iceberg lettuce          | Low  | correct   | correct   | correct   | correct   | correct   |
| enriched rice milk       | Low  | correct   | correct   | incorrect | correct   | incorrect |
| Jalapeno peppers         | Low  | incorrect | correct   | incorrect | incorrect | correct   |
| Japanese persimmon       | Low  | incorrect | incorrect | correct   | incorrect | correct   |
| Kale                     | Low  | incorrect | incorrect | correct   | correct   | correct   |
| Kumquats                 | Low  | correct   | correct   | correct   | correct   | correct   |
| Leek                     | Low  | incorrect | incorrect | incorrect | correct   | correct   |
| Lemon                    | Low  | correct   | correct   | correct   | correct   | correct   |

|                                          |     |           |           |           |           |           |
|------------------------------------------|-----|-----------|-----------|-----------|-----------|-----------|
| Lemon juice                              | Low | correct   | correct   | correct   | correct   | correct   |
| Lemonade                                 | Low | correct   | correct   | correct   | correct   | correct   |
| Lime                                     | Low | correct   | correct   | correct   | correct   | correct   |
| Mandarin orange                          | Low | correct   | correct   | correct   | correct   | incorrect |
| Mango nectar                             | Low | incorrect | incorrect | correct   | correct   | correct   |
| Okra                                     | Low | incorrect | incorrect | incorrect | correct   | correct   |
| Onion                                    | Low | correct   | correct   | incorrect | correct   | correct   |
| Papaya nectar                            | Low | incorrect | incorrect | correct   | correct   | incorrect |
| Parsley                                  | Low | incorrect | correct   | incorrect | correct   | correct   |
| Passion fruit                            | Low | incorrect | incorrect | incorrect | correct   | incorrect |
| Pea pods                                 | Low | correct   | incorrect | incorrect | correct   | incorrect |
| Peach nectar                             | Low | incorrect | incorrect | correct   | correct   | correct   |
| Peanut butter                            | Low | incorrect | incorrect | incorrect | correct   | correct   |
| Pear nectar                              | Low | incorrect | incorrect | incorrect | correct   | incorrect |
| Pears                                    | Low | incorrect | incorrect | incorrect | correct   | correct   |
| Peas                                     | Low | incorrect | incorrect | incorrect | correct   | incorrect |
| Pineapple                                | Low | correct   | incorrect | incorrect | correct   | correct   |
| Pineapple juice                          | Low | incorrect | incorrect | correct   | correct   | incorrect |
| Radishes                                 | Low | correct   | correct   | incorrect | correct   | incorrect |
| Raisins                                  | Low | incorrect | incorrect | incorrect | incorrect | correct   |
| Raspberries                              | Low | correct   | correct   | correct   | correct   | correct   |
| Reduced calorie Cranberry juice cocktail | Low | correct   | correct   | correct   | correct   | correct   |
| Romaine lettuce                          | Low | incorrect | correct   | correct   | correct   | correct   |
| Salsa                                    | Low | correct   | correct   | incorrect | correct   | correct   |
| Serra peppers                            | Low | incorrect | incorrect | incorrect | incorrect | incorrect |
| Snow peas                                | Low | incorrect | correct   | incorrect | correct   | incorrect |
| Soft tofu                                | Low | incorrect | incorrect | incorrect | correct   | correct   |
| Sour cherries                            | Low | incorrect | incorrect | correct   | incorrect | correct   |
| Spaghetti squash                         | Low | correct   | correct   | incorrect | correct   | incorrect |
| Sweet cherries                           | Low | incorrect | incorrect | incorrect | incorrect | correct   |
| Water chestnuts                          | Low | correct   | correct   | incorrect | correct   | incorrect |
| White mushrooms                          | Low | incorrect | correct   | correct   | correct   | correct   |

Supplementary Table S2 Accuracy of AI Models in Identifying High Phosphorus Foods

| Diet                 | Phosphorus level | GPT 3.5 (1 <sup>st</sup> test) | GPT 3.5 (2 <sup>nd</sup> test) | GPT4    | Bard    | Bing      |
|----------------------|------------------|--------------------------------|--------------------------------|---------|---------|-----------|
| Blue cheese          | High             | correct                        | correct                        | correct | correct | correct   |
| Cheddar cheese       | High             | correct                        | correct                        | correct | correct | correct   |
| Colby cheese         | High             | correct                        | correct                        | correct | correct | correct   |
| Mozzarella cheese    | High             | correct                        | correct                        | correct | correct | correct   |
| Swiss cheese         | High             | correct                        | correct                        | correct | correct | correct   |
| Provolone            | High             | correct                        | correct                        | correct | correct | correct   |
| Ricotta              | High             | correct                        | incorrect                      | correct | correct | correct   |
| Cheese spread        | High             | correct                        | incorrect                      | correct | correct | correct   |
| Cream                | High             | correct                        | correct                        | correct | correct | correct   |
| Half and half        | High             | correct                        | correct                        | correct | correct | correct   |
| Evaporated milk      | High             | correct                        | correct                        | correct | correct | correct   |
| Condensed milk       | High             | correct                        | correct                        | correct | correct | correct   |
| Ice cream            | High             | correct                        | correct                        | correct | correct | correct   |
| Frozen yogurt        | High             | correct                        | correct                        | correct | correct | correct   |
| Plain cow milk       | High             | correct                        | correct                        | correct | correct | correct   |
| Buttermilk           | High             | correct                        | correct                        | correct | correct | correct   |
| Pudding              | High             | correct                        | correct                        | correct | correct | correct   |
| Custard              | High             | correct                        | correct                        | correct | correct | correct   |
| Soy milk             | High             | correct                        | correct                        | correct | correct | correct   |
| Yogurt               | High             | correct                        | correct                        | correct | correct | correct   |
| Kidney beans         | High             | correct                        | correct                        | correct | correct | correct   |
| Black beans          | High             | correct                        | correct                        | correct | correct | correct   |
| Pinto beans          | High             | correct                        | correct                        | correct | correct | correct   |
| Garbanzo beans       | High             | correct                        | correct                        | correct | correct | correct   |
| Navy beans           | High             | correct                        | correct                        | correct | correct | correct   |
| Walleye fish         | High             | correct                        | correct                        | correct | correct | correct   |
| Canned sardines fish | High             | correct                        | correct                        | correct | correct | correct   |
| Hummus               | High             | correct                        | correct                        | correct | correct | incorrect |
| Lentils              | High             | correct                        | correct                        | correct | correct | incorrect |
| Black-eyed peas      | High             | correct                        | correct                        | correct | correct | correct   |
| Split green peas     | High             | correct                        | correct                        | correct | correct | correct   |
| Ham                  | High             | correct                        | correct                        | correct | correct | correct   |
| Liver                | High             | correct                        | correct                        | correct | correct | correct   |
| Processed meats      | High             | correct                        | correct                        | correct | correct | correct   |
| Nuts                 | High             | correct                        | correct                        | correct | correct | correct   |
| Seeds                | High             | correct                        | correct                        | correct | correct | correct   |

|                            |      |         |           |           |         |           |
|----------------------------|------|---------|-----------|-----------|---------|-----------|
| Peanut butter              | High | correct | correct   | correct   | correct | correct   |
| Soy burgers                | High | correct | correct   | correct   | correct | correct   |
| Bean-based veggie burgers  | High | correct | correct   | correct   | correct | correct   |
| Firm Tofu                  | High | correct | correct   | correct   | correct | incorrect |
| Extra-firm Tofu            | High | correct | correct   | correct   | correct | correct   |
| Corn                       | High | correct | correct   | correct   | correct | correct   |
| Peas                       | High | correct | correct   | correct   | correct | correct   |
| Beer                       | High | correct | incorrect | correct   | correct | correct   |
| Carbonated colas           | High | correct | correct   | correct   | correct | correct   |
| Pepper-type soft drink     | High | correct | correct   | correct   | correct | correct   |
| Fruit-flavored soft drinks | High | correct | correct   | correct   | correct | correct   |
| Bran flakes                | High | correct | correct   | correct   | correct | correct   |
| Bran buds                  | High | correct | correct   | correct   | correct | correct   |
| Bran muffin                | High | correct | correct   | correct   | correct | correct   |
| Biscuits                   | High | correct | incorrect | correct   | correct | correct   |
| Pancakes                   | High | correct | correct   | correct   | correct | correct   |
| Waffles                    | High | correct | correct   | correct   | correct | correct   |
| Frosted Mini Wheats        | High | correct | correct   | correct   | correct | correct   |
| Granola                    | High | correct | correct   | correct   | correct | correct   |
| Millet                     | High | correct | incorrect | correct   | correct | correct   |
| Quinoa                     | High | correct | incorrect | correct   | correct | correct   |
| Raisin Bran                | High | correct | correct   | correct   | correct | correct   |
| Oat bran                   | High | correct | correct   | correct   | correct | correct   |
| Old-fashioned oatmeal      | High | correct | correct   | correct   | correct | correct   |
| Wheat germ                 | High | correct | correct   | correct   | correct | correct   |
| Wheat bran                 | High | correct | correct   | correct   | correct | correct   |
| Whole-grain crackers       | High | correct | correct   | correct   | correct | correct   |
| Whole-wheat breads         | High | correct | correct   | correct   | correct | correct   |
| Whole-grain breads         | High | correct | correct   | correct   | correct | correct   |
| Wild rice                  | High | correct | correct   | correct   | correct | correct   |
| Chocolate                  | High | correct | correct   | correct   | correct | correct   |
| Doughnut                   | High | correct | correct   | correct   | correct | correct   |
| Cinnamon roll              | High | correct | correct   | correct   | correct | correct   |
| Danish                     | High | correct | correct   | correct   | correct | correct   |
| éclair                     | High | correct | correct   | incorrect | correct | correct   |
| Chocolate cream pie        | High | correct | correct   | incorrect | correct | correct   |
| Coconut cream pie          | High | correct | correct   | incorrect | correct | correct   |
| Custard pie                | High | correct | correct   | incorrect | correct | correct   |
| Pecan pie                  | High | correct | correct   | incorrect | correct | correct   |
| Pumpkin pie                | High | correct | correct   | incorrect | correct | correct   |

|                          |      |           |           |           |         |           |
|--------------------------|------|-----------|-----------|-----------|---------|-----------|
| Chocolate toaster pastry | High | correct   | correct   | incorrect | correct | correct   |
| Fat-free cream cheese    | High | incorrect | incorrect | incorrect | correct | correct   |
| Almond milk              | High | incorrect | incorrect | incorrect | correct | correct   |
| Pollock fish             | High | incorrect | incorrect | incorrect | correct | correct   |
| Avocado                  | High | incorrect | incorrect | incorrect | correct | correct   |
| Mushrooms                | High | incorrect | incorrect | incorrect | correct | correct   |
| Coconut                  | High | incorrect | incorrect | incorrect | correct | correct   |
| Brown rice               | High | incorrect | correct   | incorrect | correct | correct   |
| Regular Cheerios         | High | incorrect | incorrect | incorrect | correct | incorrect |
| Honey Nut Cheerios       | High | incorrect | incorrect | incorrect | correct | incorrect |
| Corn muffin              | High | incorrect | correct   | incorrect | correct | incorrect |
| Corn tortilla            | High | incorrect | incorrect | incorrect | correct | incorrect |
| Instant oatmeal          | High | incorrect | correct   | incorrect | correct | incorrect |
| Caramels                 | High | incorrect | incorrect | incorrect | correct | incorrect |
| Sugar-free gelatin       | High | incorrect | incorrect | incorrect | correct | incorrect |
